# Supplementary material for: Factors associated with re-entry to out-of-home care among children in England
Source: PubMed Central journal article supplement (PMC6203309; doi:10.1016/j.chiabu.2016.11.012), 2016-11-28
Supplement: NIHMS80109-supplement-Supplementary_data.pdf [file NIHMS80109-supplement-Supplementary_data.pdf]

## Supplementary Material

Supplementary Table 1

*Identifying exits and re-entries to out-of-home care using codes in Children Looked After dataset*

| Code | Department for Education description                                                                                                                                                                           | Exit from OHC?                                              | Exit type                                         | Possible to identify re-entries to OHC? |
|------|----------------------------------------------------------------------------------------------------------------------------------------------------------------------------------------------------------------|-------------------------------------------------------------|---------------------------------------------------|-----------------------------------------|
| P1   | Placed at home to live with parents, relatives, or other person with parental responsibility, but continues to be subject to a care order.                                                                     | Yes                                                         | Placed with parents <sup>a</sup>                  | Yes                                     |
| E4   | Returned home to live with parents, relatives, or other person with parental responsibility (not under a residence order or special guardianship order).                                                       | Yes                                                         | Returned home                                     | Yes                                     |
| E43  | Special guardianship order made to former foster carers.                                                                                                                                                       | Yes                                                         | Special guardianship order                        | Yes                                     |
| E44  | Special guardianship order made to carers other than former foster carers.                                                                                                                                     |                                                             |                                                   |                                         |
| E41  | Residence order granted.                                                                                                                                                                                       | Yes                                                         | Residence order                                   | Yes                                     |
| E5   | Moved into independent living arrangement and no longer looked after: supportive accommodation providing formalised advice/support arrangements (e.g. most hostels, YMCAs, foyers, and care leavers projects). | Yes                                                         | Independent living <sup>b</sup>                   | Yes                                     |
| E6   | Moved into independent living arrangement and no longer looked after: supportive accommodation providing no formalised advice/support arrangements (e.g. bedsit, own flat, living with friends).               |                                                             |                                                   |                                         |
| E8   | Period of being looked after ceased for any other reason.                                                                                                                                                      | Yes                                                         | Other                                             | Yes                                     |
| E11  | Adopted – application for an adoption order unopposed.                                                                                                                                                         | Yes                                                         | Adoption                                          | No <sup>c</sup>                         |
| E12  | Adopted – consent dispensed with by court.                                                                                                                                                                     |                                                             |                                                   |                                         |
| E9   | Sentenced to custody.                                                                                                                                                                                          | Yes                                                         | Sentenced to custody                              | Yes <sup>d</sup>                        |
| E2   | Died.                                                                                                                                                                                                          | Yes                                                         | Died                                              | n/a                                     |
| E7   | Transferred to care funded by Adult Social Services.                                                                                                                                                           | Yes                                                         | Transferred to adult social services <sup>e</sup> | n/a                                     |
| E3   | Care taken over by another local authority in the UK.                                                                                                                                                          | No - care continues in another local authority <sup>f</sup> | n/a                                               | n/a                                     |

OHC=out-of-home care. CLA = Children Looked After. <sup>a</sup>Episodes of care that cease due to a child's placement changing from out-of-home accommodation (such as foster care) to "placed with parents" can also be interpreted as an exit from OHC, as the child is returned home but continues to be supervised by the local authority. <sup>b</sup>Independent living is only used for older adolescents, typically after the age of 16. <sup>c</sup>Children who are adopted are assigned new child identifiers, which prevents linkage of pre- and post-adoption records of care. <sup>d</sup>Time to re-entry will be influenced by length of stay in custody, which is not recorded in the CLA dataset. <sup>e</sup>Generally, only children that require ongoing residential accommodation transfer to adult social services. This transfer usually occurs at age of 18. <sup>f</sup>As the main identifier in CLA dataset (child ID) is local authority specific, it is not possible to link records of care across these boundaries.

Running head: FACTORS ASSOCIATED WITH RE-ENTRY TO CARE

Supplementary Table 2

*Hazard ratios during development of the final multivariate Cox proportional hazards model*

| Model number (variables included) |                              | M1          |             |             | M2                           |             |             | M3                                   |             |             | M4                                  |             |             |
|-----------------------------------|------------------------------|-------------|-------------|-------------|------------------------------|-------------|-------------|--------------------------------------|-------------|-------------|-------------------------------------|-------------|-------------|
|                                   |                              | (Exit type) |             |             | (M1 + child characteristics) |             |             | (M2 + care characteristics at entry) |             |             | (M3 + care characteristics at exit) |             |             |
| Time since exit (months)          |                              | 0-3         | 3-12        | 12-60       | 0-3                          | 3-12        | 12-60       | 0-3                                  | 3-12        | 12-60       | 0-3                                 | 3-12        | 12-60       |
| Type of exit                      | Returned home                | (ref)       | (ref)       | (ref)       | (ref)                        | (ref)       | (ref)       | (ref)                                | (ref)       | (ref)       | (ref)                               | (ref)       | (ref)       |
|                                   | Placed with parents          | <b>1.42</b> | <b>3.18</b> | <b>0.85</b> | <b>2.92</b>                  | <b>4.81</b> | <b>4.47</b> | <b>3.05</b>                          | <b>4.87</b> | <b>4.17</b> | <b>6.64</b>                         | <b>9.72</b> | <b>6.50</b> |
|                                   | Special guardianship order   | <b>0.01</b> | <b>0.06</b> | <b>0.16</b> | <b>0.01</b>                  | <b>0.07</b> | <b>0.17</b> | <b>0.01</b>                          | <b>0.07</b> | <b>0.16</b> | <b>0.01</b>                         | <b>0.15</b> | <b>0.26</b> |
|                                   | Residence order              | <b>0.06</b> | <b>0.23</b> | <b>0.21</b> | <b>0.06</b>                  | <b>0.24</b> | <b>0.21</b> | <b>0.07</b>                          | <b>0.25</b> | <b>0.21</b> | <b>0.15</b>                         | <b>0.40</b> | <b>0.27</b> |
|                                   | Other                        | 1.12        | <b>0.72</b> | <b>0.55</b> | 1.04                         | <b>0.68</b> | <b>0.51</b> | 1.07                                 | <b>0.69</b> | <b>0.51</b> | 1.21                                | 0.79        | <b>0.57</b> |
| Age group at exit (years)         | <1 year                      |             |             |             | (ref)                        | (ref)       | (ref)       | (ref)                                | (ref)       | (ref)       | (ref)                               | (ref)       | (ref)       |
|                                   | 1 to 4 year                  |             |             |             | 0.86                         | 0.86        | 0.86        | <b>0.80</b>                          | <b>0.80</b> | <b>0.80</b> | 0.95                                | 0.95        | 0.95        |
|                                   | 5 to 11 years                |             |             |             | 1.03                         | 1.03        | 1.03        | 0.60                                 | 0.60        | 0.60        | 1.12                                | 1.12        | 1.12        |
|                                   | 11 to 15 years               |             |             |             | <b>1.57</b>                  | <b>1.57</b> | <b>1.57</b> | <b>1.31</b>                          | <b>1.31</b> | <b>1.31</b> | <b>1.49</b>                         | <b>1.49</b> | <b>1.49</b> |
| Ethnic category                   | Black, Asian or Other        |             |             |             | (ref)                        | (ref)       | (ref)       | (ref)                                | (ref)       | (ref)       | (ref)                               | (ref)       | (ref)       |
|                                   | White or Mixed               |             |             |             | <b>1.64</b>                  | <b>1.64</b> | <b>1.64</b> | <b>1.44</b>                          | <b>1.44</b> | <b>1.44</b> | <b>1.50</b>                         | <b>1.50</b> | <b>1.50</b> |
| Reason in OHC                     | Abuse or neglect             |             |             |             |                              |             |             | (ref)                                | (ref)       | (ref)       | (ref)                               | (ref)       | (ref)       |
|                                   | Child disability             |             |             |             |                              |             |             | 1.21                                 | 0.85        | 1.35        | 1.30                                | 0.88        | <b>1.45</b> |
|                                   | Parental health              |             |             |             |                              |             |             | 0.96                                 | 1.17        | 1.26        | 0.90                                | 1.09        | 1.23        |
|                                   | Family stress or dysfunction |             |             |             |                              |             |             | <b>1.55</b>                          | <b>1.24</b> | 0.99        | <b>1.48</b>                         | 0.17        | 0.96        |
|                                   | Unacceptable behavior        |             |             |             |                              |             |             | 1.12                                 | <b>1.63</b> | 1.41        | 1.09                                | 1.60        | 1.36        |
|                                   | Absent parenting             |             |             |             |                              |             |             | <b>0.54</b>                          | <b>0.47</b> | <b>0.34</b> | <b>0.54</b>                         | <b>0.44</b> | <b>0.35</b> |
| Previous history of OHC?          | No                           |             |             |             |                              |             |             | (ref)                                | (ref)       | (ref)       | (ref)                               | (ref)       | (ref)       |
|                                   | Yes                          |             |             |             |                              |             |             | <b>2.06</b>                          | <b>2.06</b> | <b>2.06</b> | <b>1.44</b>                         | <b>1.44</b> | <b>1.44</b> |
| Placement changes                 | No changes                   |             |             |             |                              |             |             |                                      |             |             | (ref)                               | (ref)       | (ref)       |
|                                   | 1 to 4 changes               |             |             |             |                              |             |             |                                      |             |             | 1.03                                | 1.03        | 1.03        |
|                                   | 5+ changes                   |             |             |             |                              |             |             |                                      |             |             | <b>1.50</b>                         | <b>1.50</b> | <b>1.50</b> |
| Average placement length          | <3 months                    |             |             |             |                              |             |             |                                      |             |             | (ref)                               | (ref)       | (ref)       |
|                                   | 3-9 months                   |             |             |             |                              |             |             |                                      |             |             | <b>0.46</b>                         | 1.04        | 1.18        |
|                                   | 9+ months                    |             |             |             |                              |             |             |                                      |             |             | <b>0.34</b>                         | <b>0.51</b> | <b>0.61</b> |
| In care voluntarily?              | No                           |             |             |             |                              |             |             |                                      |             |             | (ref)                               | (ref)       | (ref)       |
|                                   | Yes                          |             |             |             |                              |             |             |                                      |             |             | <b>1.83</b>                         | <b>2.03</b> | <b>1.47</b> |

OHC=out-of-home care. Bold denotes significance at level  $p < 0.05$ . Three periods of follow-up during which the hazards of explanatory variables were proportional were identified; 0 to 3 months, 3 to 12 months and 1 to 5 years. The corresponding columns in Supplementary Table 2 present the hazard ratio of re-entry among the population still at risk of re-entry during this period (i.e. excluding children who had already re-entered care). The sample sizes for each period are as follows; 0 and 3 months  $N=4,076$ ; 3 to 12 months  $N=3,535$ ; 12 to 60 months  $N=3,054$ .

Supplementary Table 3

*Percentage of exits from out-of-home care (2007-2012), by age group at exit*

|                            | Year of exit |       |       |       |       |       | Change over time | p-value           |
|----------------------------|--------------|-------|-------|-------|-------|-------|------------------|-------------------|
|                            | 2007         | 2008  | 2009  | 2010  | 2011  | 2012  |                  |                   |
| <b>&lt;1 year (N)</b>      | 469          | 466   | 493   | 503   | 514   | 595   |                  |                   |
| Returned home              | 51.8         | 54.9  | 52.9  | 50.5  | 50.6  | 42.2  | -9.6%            | <b>0.002</b>      |
| Placed with parents        | 20.7         | 20.2  | 19.1  | 22.5  | 27.0  | 23.9  | +3.2%            | 0.22              |
| Adopted                    | 9.8          | 6.4   | 4.9   | 4.0   | 4.1   | 6.4   | -3.4%            | <b>0.04</b>       |
| Special guardianship order | 6.6          | 5.8   | 7.7   | 7.4   | 7.6   | 14.1  | +7.5%            | <b>&lt; 0.001</b> |
| Residence order            | 4.5          | 5.2   | 6.5   | 6.6   | 4.7   | 8.1   | +3.6%            | <b>0.02</b>       |
| Other                      | 6.6          | 7.5   | 8.9   | 9.1   | 6.0   | 5.4   | -1.2%            | 0.41              |
| <b>1 to 4 years (N)</b>    | 1,675        | 1,865 | 1,821 | 2,012 | 2,220 | 2,350 |                  |                   |
| Returned home              | 31.5         | 31.8  | 35.3  | 31.4  | 27.2  | 25.4  | -6.1%            | <b>&lt; 0.001</b> |
| Placed with parents        | 11.5         | 10.7  | 9.0   | 10.3  | 10.8  | 9.9   | -1.7%            | 0.10              |
| Adopted                    | 39.9         | 41.2  | 38.7  | 35.4  | 37.5  | 39.0  | -1.0%            | 0.56              |
| Special guardianship order | 8.1          | 8.1   | 8.7   | 13.3  | 15.7  | 17.4  | +9.3%            | <b>&lt; 0.001</b> |
| Residence order            | 4.4          | 3.9   | 4.3   | 4.8   | 5.7   | 5.9   | +1.5%            | <b>0.03</b>       |
| Other                      | 4.5          | 4.2   | 4.0   | 4.8   | 3.2   | 2.4   | -2.1%            | <b>&lt; 0.001</b> |
| <b>5 to 10 years (N)</b>   | 1,238        | 1,169 | 1,239 | 1,326 | 1,325 | 1,496 |                  |                   |
| Returned home              | 46.0         | 48.8  | 46.2  | 50.3  | 44.5  | 39.7  | -6.3%            | <b>&lt; 0.001</b> |
| Placed with parents        | 13.2         | 10.7  | 11.9  | 10.0  | 12.4  | 9.6   | -3.7%            | <b>0.003</b>      |
| Adopted                    | 21.8         | 21.0  | 22.0  | 18.6  | 18.3  | 19.3  | -2.5%            | 0.10              |
| Special guardianship order | 8.2          | 9.3   | 9.3   | 11.8  | 15.2  | 19.8  | +11.6%           | <b>&lt; 0.001</b> |
| Residence order            | 4.8          | 5.0   | 4.4   | 5.0   | 5.4   | 8.0   | +3.2%            | <b>&lt; 0.001</b> |
| Other                      | 6.0          | 5.0   | 6.2   | 4.4   | 4.2   | 3.7   | -2.3%            | <b>0.01</b>       |
| <b>11 to 15 years (N)</b>  | 1,485        | 1,643 | 1,647 | 1,625 | 1,526 | 1,470 |                  |                   |
| Returned home              | 66.3         | 69.3  | 70.0  | 69.7  | 72.2  | 69.6  | +3.3%            | 0.06              |
| Placed with parents        | 13.5         | 11.0  | 10.0  | 10.5  | 8.7   | 9.7   | -3.7%            | <b>0.001</b>      |
| Adopted                    | 1.3          | 1.5   | 0.9   | 1.2   | 0.8   | 1.2   | -0.1%            | 0.81              |
| Special guardianship order | 3.6          | 3.0   | 4.4   | 4.4   | 5.9   | 6.5   | +2.9%            | <b>&lt; 0.001</b> |
| Residence order            | 1.3          | 2.1   | 1.9   | 2.8   | 2.5   | 3.4   | +2.1%            | <b>&lt; 0.001</b> |
| Independent living         | 0.6          | 0.9   | 0.5   | 0.5   | 0.5   | 0.6   | N/A              | 0.99              |
| Other                      | 13.4         | 12.2  | 12.4  | 11.0  | 9.4   | 9.0   | -4.4%            | <b>&lt; 0.001</b> |

Children placed with parents continue to be supervised by a local authority, children returned home do not. Periods of being looked after that cease for any other reason are recorded as “other” in the Children Looked After return. The total number of exits (*N*) was 4,867 in 2007, 5,143 in 2008, 5,200 in 2009, 5,466 in 2010, 5,585 in 2011 and 5,911 in 2012.

## Supplementary Table 4

*Percentage of children exiting out-of-home care in 2008 and 2012 with selected characteristics, by likelihood of rapid re-entry*

| Year of exit                               | 2008           |                     |                   | 2012             |                     |                   |
|--------------------------------------------|----------------|---------------------|-------------------|------------------|---------------------|-------------------|
|                                            | Low<br>(N=707) | Medium<br>(N=2,026) | High<br>(N=1,343) | Low<br>(N=1,287) | Medium<br>(N=2,211) | High<br>(N=1,152) |
| <i>Age at exit (years)</i>                 |                |                     |                   |                  |                     |                   |
| <1                                         | 6.7            | 13.4                | 8.8               | 10.2             | 15.0                | 8.1               |
| 1 to 4                                     | 59.8           | 32.2                | 1.5               | 54.0             | 32.8                | 1.2               |
| 5 to 10                                    | 23.5           | 24.9                | 18.8              | 27.3             | 27.5                | 21.6              |
| 11 to 15                                   | 10.0           | 29.5                | 71.0              | 8.5              | 24.7                | 69.1              |
| <i>Ethnic category<sup>a</sup></i>         |                |                     |                   |                  |                     |                   |
| White                                      | 65.1           | 64.4                | 84.2              | 72.6             | 67.0                | 81.7              |
| Mixed                                      | 10.0           | 10.1                | 7.7               | 10.1             | 10.0                | 9.3               |
| Asian                                      | 6.8            | 7.5                 | 2.2               | 5.1              | 6.7                 | 2.4               |
| Black                                      | 15.7           | 14.5                | 4.5               | 9.4              | 12.7                | 4.7               |
| Other (including Chinese)                  | 2.4            | 3.0                 | 0.7               | 2.3              | 2.5                 | 0.8               |
| <i>Reason for entering OHC<sup>b</sup></i> |                |                     |                   |                  |                     |                   |
| Abuse or neglect                           | 67.8           | 60.1                | 36.7              | 70.2             | 65.7                | 43.7              |
| Child's disability                         | 0.1            | 0.2                 | 5.6               | 0.0              | 0.4                 | 5.3               |
| Parental disability                        | 8.5            | 8.1                 | 4.4               | 6.8              | 5.6                 | 2.5               |
| Family in acute stress                     | 5.1            | 9.3                 | 21.1              | 5.5              | 7.5                 | 17.8              |
| Family dysfunction                         | 9.5            | 11.0                | 24.0              | 13.0             | 14.0                | 26.6              |
| Socially unacceptable behavior             | 1.0            | 3.8                 | 7.5               | 0.6              | 2.7                 | 3.9               |
| Low income                                 | 0.4            | 0.3                 | 0.5               | 0.4              | 0.2                 | 0.2               |
| Absent parenting                           | 7.6            | 7.3                 | 0.2               | 3.6              | 4.0                 | 0.1               |
| <i>Previous history of OHC?</i>            |                |                     |                   |                  |                     |                   |
| Yes                                        | 87.6           | 88.1                | 74.1              | 90.3             | 90.0                | 77.1              |
| No                                         | 12.4           | 11.9                | 24.9              | 9.7              | 10.0                | 22.9              |
| <i>In OHC voluntarily?</i>                 |                |                     |                   |                  |                     |                   |
| Yes                                        | 11.0           | 54.9                | 97.7              | 15.1             | 54.2                | 97.1              |
| No                                         | 89.0           | 45.1                | 2.3               | 84.9             | 45.8                | 2.9               |
| <i>Average placement length</i>            |                |                     |                   |                  |                     |                   |
| <3 months                                  | 6.7            | 32.5                | 64.7              | 3.5              | 27.2                | 61.9              |
| 3-9 months                                 | 17.3           | 13.7                | 2.2               | 16.7             | 14.6                | 2.5               |
| 9+ months                                  | 76.0           | 53.8                | 33.1              | 79.8             | 58.2                | 35.6              |
| <i>Type of exit from OHC<sup>c</sup></i>   |                |                     |                   |                  |                     |                   |
| Returned home                              | 20.1           | 62.0                | 86.5              | 10.3             | 59.7                | 88.0              |
| Placed with parents                        | 7.9            | 26.0                | 1.2               | 4.0              | 26.3                | 2.3               |
| Special guardianship                       | 45.0           | 0.9                 | -                 | 61.9             | 3.9                 | -                 |
| Residence order                            | 21.9           | 1.7                 | -                 | 21.9             | 3.3                 | 0.2               |
| Other                                      | 5.1            | 9.4                 | 12.3              | 1.9              | 6.8                 | 9.5               |

Supplementary Table 4 shows selected characteristics (i.e. those included in the predictive model) of children in the calibration and validation datasets. OHC=out-of-home care.

<sup>a</sup>Ethnicity was not recorded for 0.5% ( $n=19$ ) of the children exiting OHC in 2008 and 1.0% ( $n=45$ ) of children exiting in 2012. <sup>b</sup>Though there may be multiple reasons why a child enters out-of-home care, only one can be recorded in the Children Looked After (CLA) dataset.

When more than one applies to a case the highest ordered reason in the list is chosen. For further details of these “category of need” codes please see (Mc Grath-Lone et al, 2016).

<sup>c</sup>Children returned home are no longer under the supervision of social services, whereas children placed with parents continue to be supervised. Periods of being looked after that ceased for any other reason are recorded as “other” in the CLA dataset.



Supplementary Figure 1

Flow chart of study sample creation from Children Looked After data

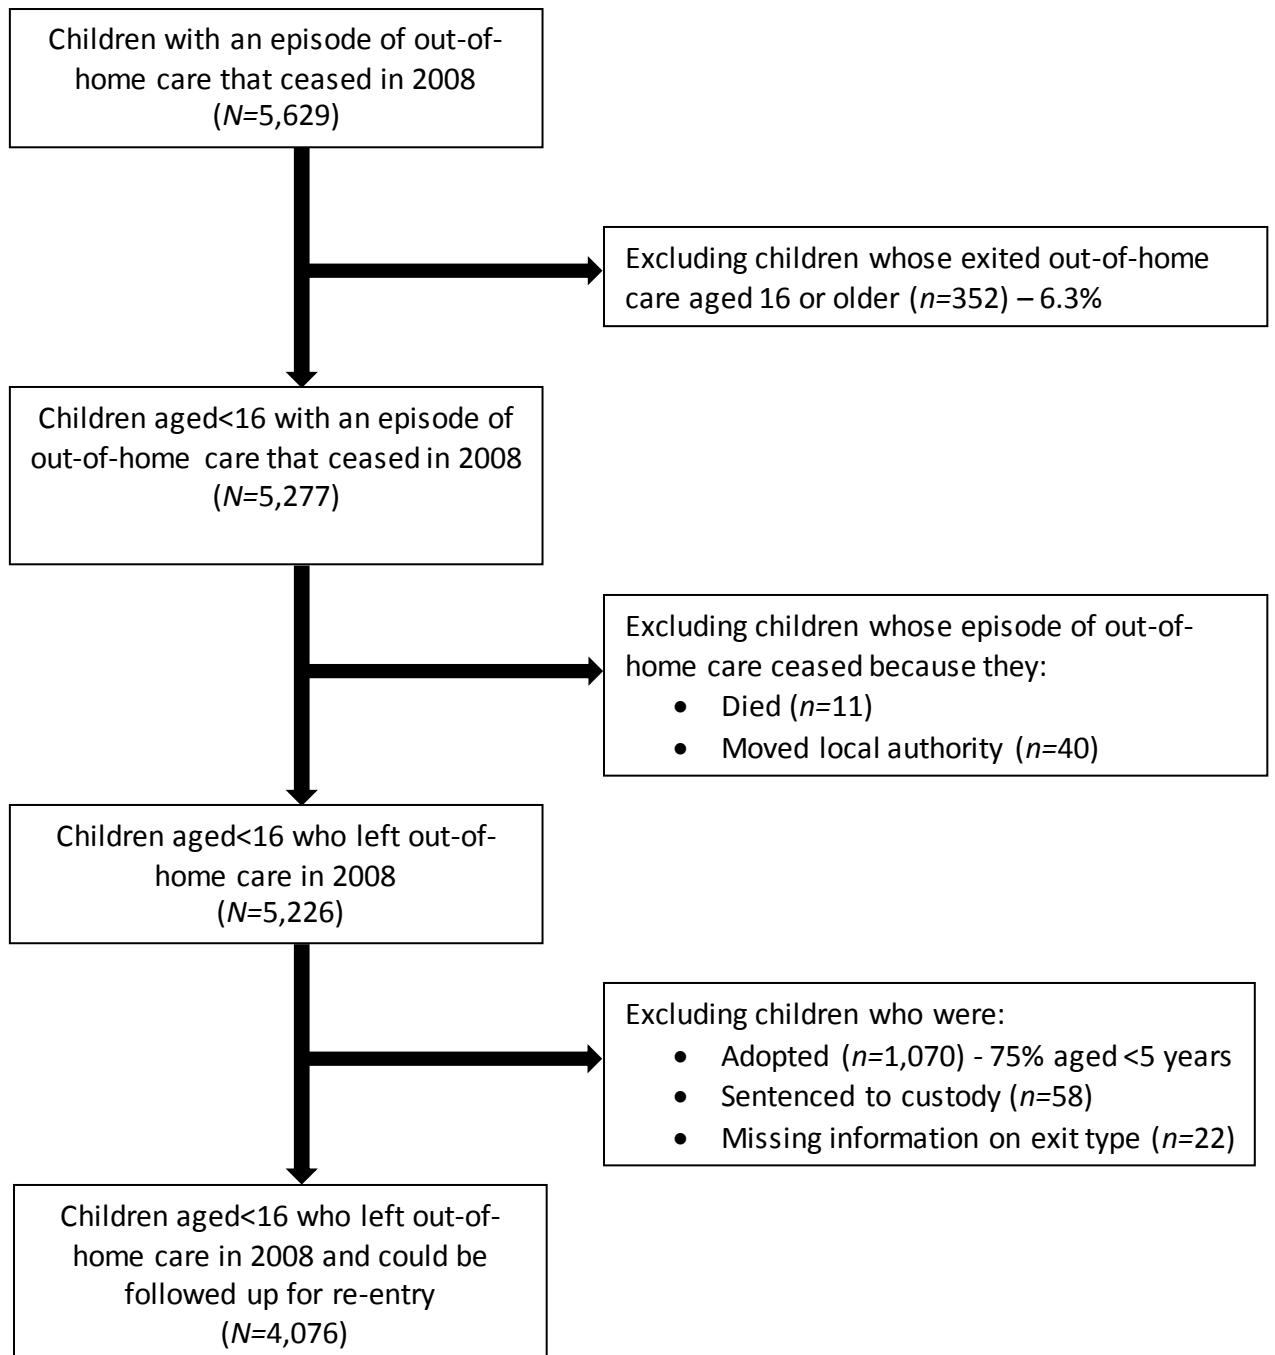

Supplementary Figure 2

*Cumulative regression coefficient indicating time-varying effect*

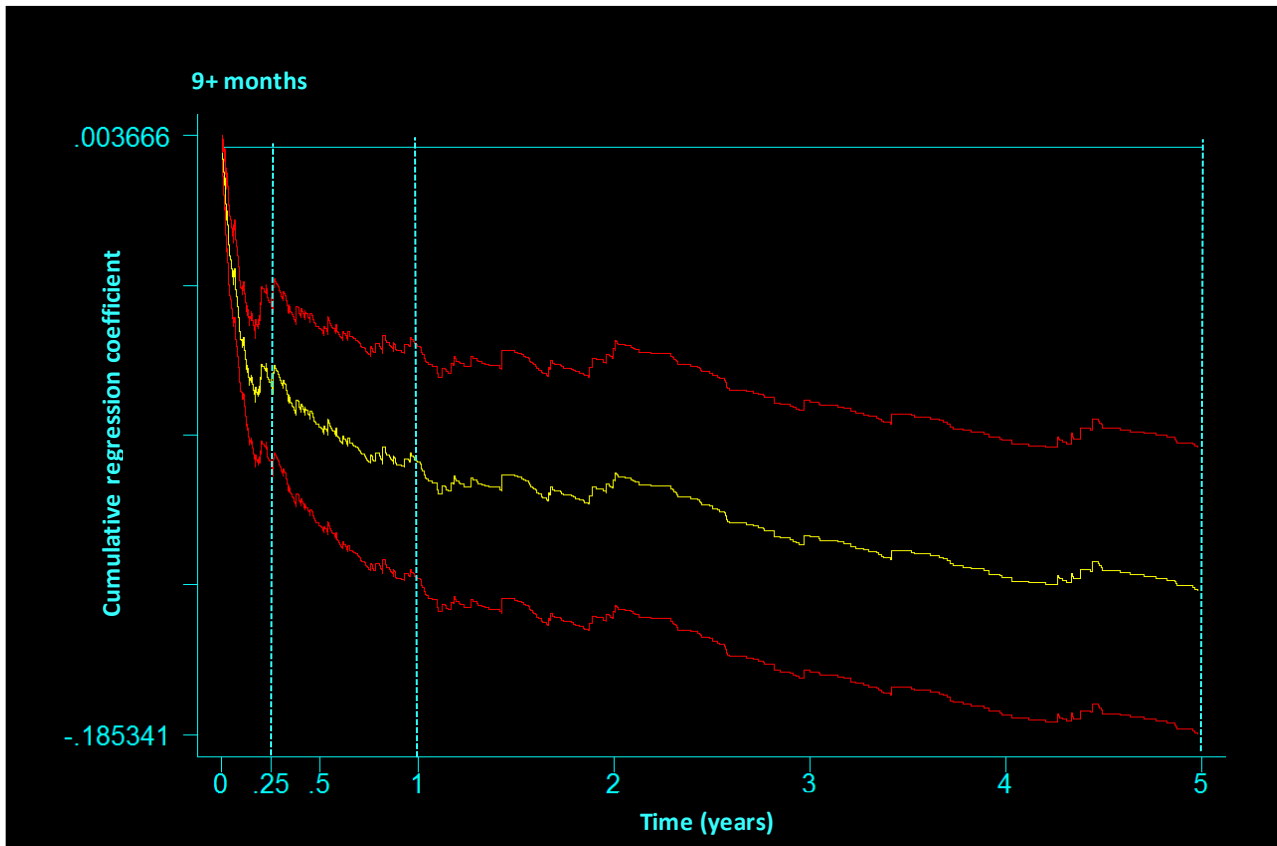

Supplementary Figure 2 shows the cumulative regression coefficient (yellow line) with 95% confidence intervals (red lines) for the explanatory variable “average placement length” of nine months or longer using Aalen’s linear hazard model. From the plot, three periods during the five year follow-up for which there are time-varying proportional hazards for the explanatory variable were identified. A strong negative effect was evident from 0 to 3 months, between 3 months and 1 year the strength of the effect diminished and after one year decreased further. As a result, three variables were created to capture the varying relationship over time between a child’s average placement length and re-entry to out-of-home care.
